# Supplementary material for: Facile fabrication of stretchable, anti-freezing, and stable organohydrogels for strain sensing at subzero temperatures
Source: Royal Society of Chemistry journal article supplement (doi:10.1039/d4ma00725e), 2024-01-01
Supplement: d4ma00725e1.pdf [file d4ma00725e1.pdf]

**Facile fabrication of stretchable, anti-freezing, and stable organohydrogels for strain sensing at subzero temperatures**

Muhammad sher<sup>1</sup>, Luqman Ali Shah<sup>1\*</sup>, Jun Fu<sup>2</sup>, Hyeong-Min Yoo<sup>3</sup>, Riaz Ullah<sup>4</sup>, Mohamed A. Ibrahim<sup>4</sup>

*<sup>1</sup>Polymer Laboratory, National Centre of Excellence in Physical Chemistry, University of Peshawar, 25120, Pakistan*

*<sup>2</sup>Key Laboratory of Polymeric Composite and Functional Materials, School of Materials Science and Engineering, Sun Yat-sen University, Guangzhou 510275, China*

*<sup>3</sup>School of Mechanical Engineering, Korea University of Technology and Education (KOREATECH), Cheonan 31253, Republic of Korea*

*<sup>4</sup>Department of Pharmaceutics, College of Pharmacy, King Saud University, Riyadh 11451, Saudi Arabia*

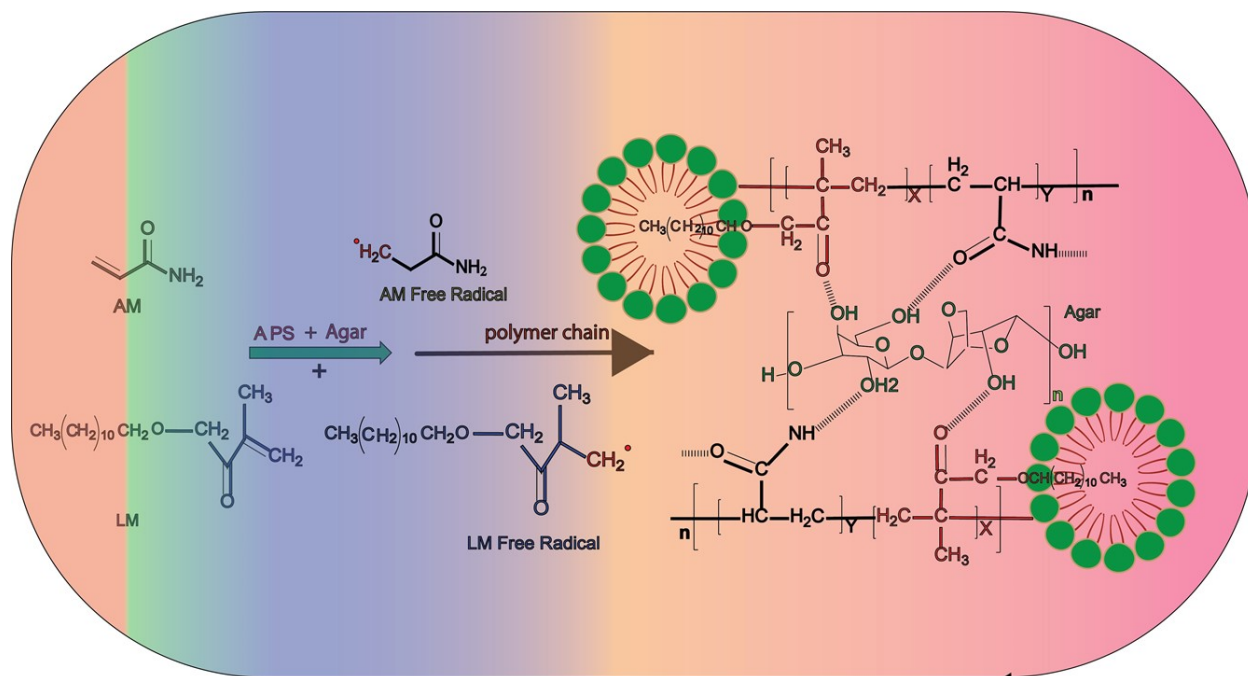

**Figure S1**, schematic steps of polymerization and targeted polymer internal chemistry

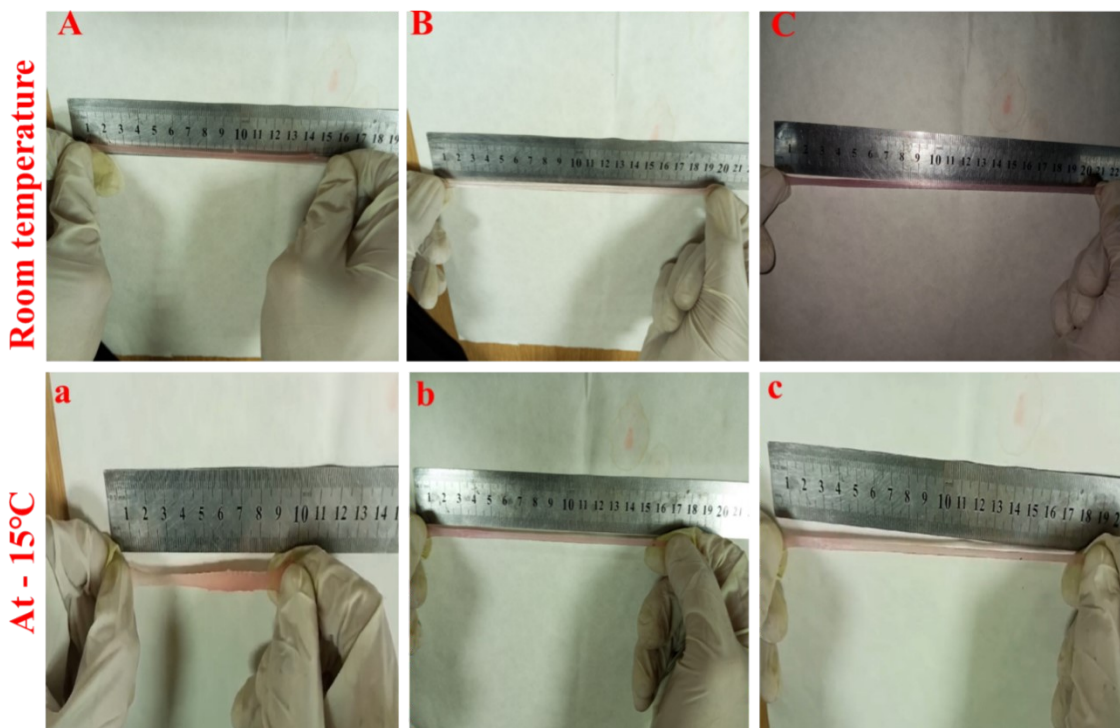

**Figure S2** Photographs showing the stretching of hydrogels and OHGs at room temperature and at  $-15^{\circ}\text{C}$ . At room temperature picture A, B, and C respectively shows the stretching of sample S6, S1, and S2. Similarly, picture a, b, and c shows the stretching of samples S6, S1, and S2 at  $-15^{\circ}\text{C}$  respectively.

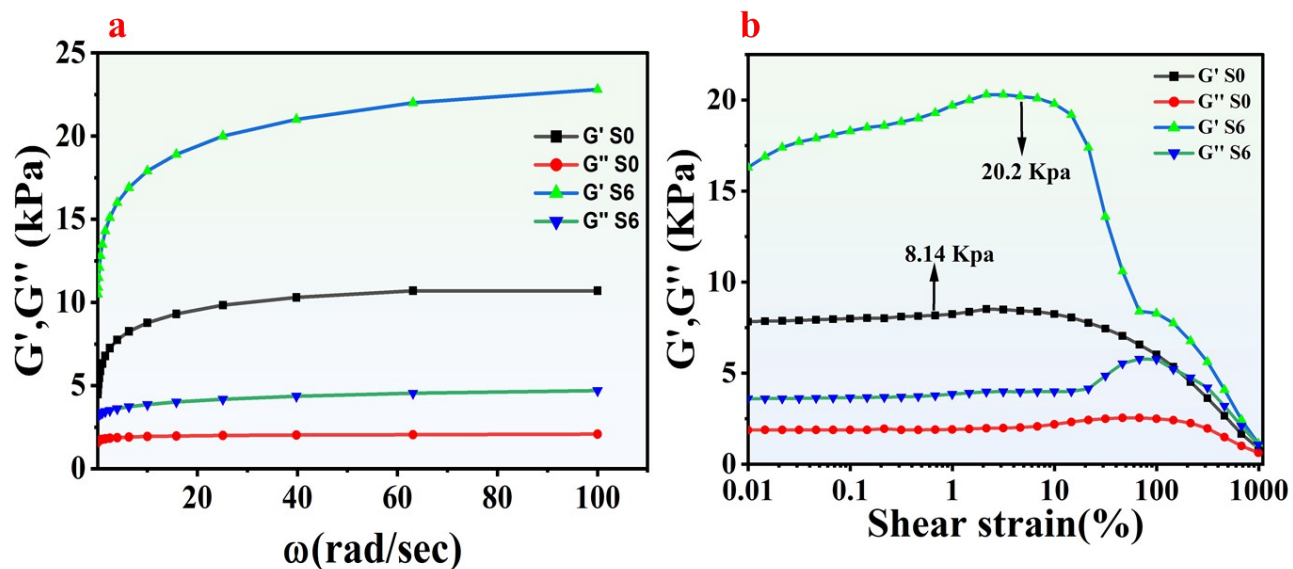

**Figure S3** The rheological investigation of samples S0 and S6. (a) the frequency sweep test between 0.1 to 100 rad/sec, (b) the amplitude sweep study performed between 0.01 to 1000% strains at a constant frequency of 10 rad/sec.

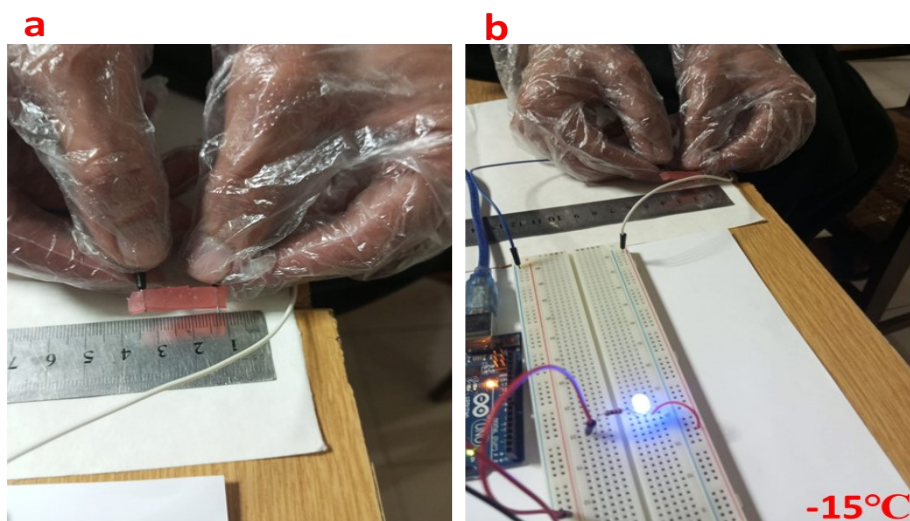

**Figure S4** Demonstration of strain sensitivity in view of LED performance towards OHGs, (a) a small piece of sample S2 attached to the two electrodes, (b) LED illumination showing the conductive nature of the OHGs.

**Table S1** Comparison of the key performance parameters of the current research with those recently reported studies of the same type.

| <b>Hydrogel composition</b> | <b>Gauge factor</b> | <b>Working temp. range (°C)</b> | <b>Stretchability (%)</b> | <b>Response/recovery time (ms)</b> | <b>Conductivity (S/m)</b> | <b>References</b> |
|-----------------------------|---------------------|---------------------------------|---------------------------|------------------------------------|---------------------------|-------------------|
| HPMC-g-P(AN-co-AM)          | -                   | -25 to 25                       | 1730                      | -                                  | 1.54                      | [1]               |
| (PACG-M) Ti3C2TX MXene      | 3.93                | - 20 to 80                      | 1000                      | 500                                | 1.34                      | [2]               |
| PDMS-MXene/CNF              | -                   | -20 to 200                      | -                         | -                                  | $10^{-8}$ to 10           | [3]               |
| MWCNT/CB-PDMS               | 8                   | RT                              | 35                        | 1200/2400                          | -                         | [4]               |
| PAmm/PDDMA/MA               | 6.9                 | RT                              | 2102                      | 80/60                              | 0.20                      | [5]               |
| PAM-QACNF-MXene             | 2.24                | RT                              | 1465                      | 141/140                            | 1.281                     | [6]               |
| Poly(Am-co-LM@Ag)           | 10.14               | -15 to 25                       | 1200                      | 100/80                             | 0.45                      | <b>This work</b>  |

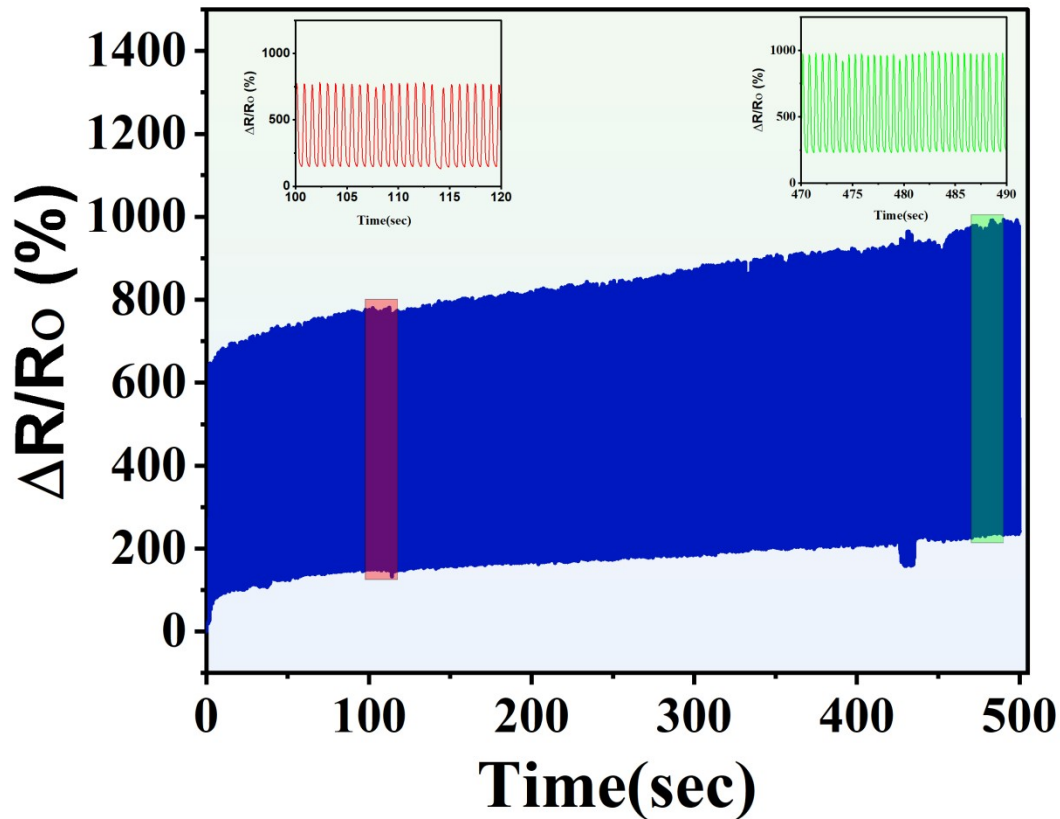

Figure S5 Multiple cycles test showing fatigue resistance over a strain of 200%.

## References

1. Chen, D., et al., *Ultrastretchable, tough, antifreezing, and conductive cellulose hydrogel for wearable strain sensor*. ACS Applied Materials & Interfaces, 2020. **12**(47): p. 53247-53256.
2. Li, S.-N., et al., *Environmentally stable, mechanically flexible, self-adhesive, and electrically conductive Ti<sub>3</sub>C<sub>2</sub>TX MXene hydrogels for wide-temperature strain sensing*. Nano Energy, 2021. **90**: p. 106502.

3. Chen, H.Y., et al., *Self-adhesive polydimethylsiloxane foam materials decorated with MXene/cellulose nanofiber interconnected network for versatile functionalities*. *Advanced Functional Materials*, 2023. **33**(48): p. 2304927.
4. Lee, J.H., et al., *Heterogeneous structure omnidirectional strain sensor arrays with cognitively learned neural networks*. *Advanced Materials*, 2023. **35**(13): p. 2208184.
5. Hifsa, H., et al., *Multifunctional Capabilities of Malonic Acid-Bridged Conductive Hydrogels for Wearable Electronic Devices*. *ACS Applied Polymer Materials*, 2024.
6. Ni, Q.-Y., et al., *Mechanical tough and stretchable quaternized cellulose nanofibrils/MXene conductive hydrogel for flexible strain sensor with multi-scale monitoring*. *Journal of Materials Science & Technology*, 2024. **191**: p. 181-191.
